# Supplementary material for: Yearly fluctuations of flower landscape in a Mediterranean scrubland: Consequences for floral resource availability
Source: PubMed Central journal article supplement (PMC5773194; doi:10.1371/journal.pone.0191268), 2018-01-18
Supplement: pone.0191268.s002.pdf [file pone.0191268.s002.pdf]

**S2 Table. Results of analyses exploring phylogenetic (Bloomberg's K test) constraints on flowering pattern variability.**

|                                      | K    | P     |
|--------------------------------------|------|-------|
| Variation (CV) in flower density     | 0.53 | 0.280 |
| Variation (SD) in flowering peak     | 0.66 | 0.124 |
| Variation (SD) in flowering duration | 0.40 | 0.682 |
