# Supplementary material for: Yearly fluctuations of flower landscape in a Mediterranean scrubland: Consequences for floral resource availability
Source: PubMed Central journal article supplement (PMC5773194; doi:10.1371/journal.pone.0191268), 2018-01-18
Supplement: pone.0191268.s003.pdf [file pone.0191268.s003.pdf]

**S3 Table. Descriptive statistics of flower density, flowering peak and flowering duration of the 23 main plant species of the Garraf community. Species ordered by timing of flowering peak.**

| Species                        | Family         | Flower density<br>(flowers/ha) |         |      | Flowering peak<br>(week) |      | Flowering duration<br>(weeks) |      |      |
|--------------------------------|----------------|--------------------------------|---------|------|--------------------------|------|-------------------------------|------|------|
|                                |                | Mean                           | SD      | CV   | Mean                     | SD   | Mean                          | SD   | CV   |
| <i>Rosmarinus officinalis</i>  | Lamiaceae      | 8328720                        | 5247094 | 0.63 | 3                        | 1.31 | 13                            | 3.11 | 0.24 |
| <i>Thymus vulgaris</i>         | Lamiaceae      | 7351342                        | 3234590 | 0.44 | 6                        | 2.00 | 13                            | 2.90 | 0.22 |
| <i>Euphorbia flavicoma</i>     | Euphorbiaceae  | 294603                         | 106057  | 0.36 | 6                        | 1.51 | 14                            | 1.83 | 0.13 |
| <i>Ranunculus gramineus</i>    | Ranunculaceae  | 1443                           | 736     | 0.51 | 6                        | 1.96 | 7                             | 1.96 | 0.28 |
| <i>Iris lutescens</i>          | Iridaceae      | 4318                           | 6693    | 1.55 | 6                        | 1.67 | 5                             | 2.80 | 0.56 |
| <i>Muscari neglectum</i>       | Liliaceae      | 2098                           | 2581    | 1.23 | 6                        | 1.75 | 5                             | 2.07 | 0.41 |
| <i>Cistus albidus</i>          | Cistaceae      | 54460                          | 15249   | 0.28 | 8                        | 1.07 | 13                            | 3.48 | 0.27 |
| <i>Cistus salvifolius</i>      | Cistaceae      | 2300                           | 1311    | 0.57 | 8                        | 2.07 | 7                             | 2.12 | 0.30 |
| <i>Orobanche latisquama</i>    | Orobanchaceae  | 19949                          | 22143   | 1.11 | 8                        | 1.04 | 6                             | 3.11 | 0.52 |
| <i>Gladiolus illyricus</i>     | Iridaceae      | 15543                          | 10414   | 0.67 | 9                        | 1.06 | 7                             | 1.41 | 0.20 |
| <i>Biscutela laevigata</i>     | Brassicaceae   | 27560                          | 10197   | 0.37 | 10                       | 1.06 | 14                            | 2.07 | 0.15 |
| <i>Dorycnium hirsutum</i>      | Fabaceae       | 4114                           | 3209    | 0.78 | 10                       | 2.00 | 6                             | 2.97 | 0.50 |
| <i>Anagallis arvensis</i>      | Primulaceae    | 24886                          | 36831   | 1.48 | 10                       | 3.14 | 8                             | 2.49 | 0.31 |
| <i>Scorpiurus muricatus</i>    | Fabaceae       | 4045                           | 6796    | 1.68 | 10                       | 2.12 | 5                             | 3.63 | 0.73 |
| <i>Sideritis hirsuta</i>       | Lamiaceae      | 186707                         | 280061  | 1.50 | 11                       | 1.31 | 9                             | 1.75 | 0.19 |
| <i>Phlomis lychnitis</i>       | Lamiaceae      | 1376                           | 1830    | 1.33 | 11                       | 1.39 | 4                             | 2.77 | 0.69 |
| <i>Convolvulus althaeoides</i> | Convolvulaceae | 2377                           | 1569    | 0.66 | 11                       | 1.49 | 7                             | 2.33 | 0.33 |
| <i>Linum strictum</i>          | Linaceae       | 30259                          | 35100   | 1.16 | 11                       | 0.55 | 7                             | 1.64 | 0.23 |
| <i>Centaurea linifolia</i>     | Asteraceae     | 18370                          | 13226   | 0.72 | 12                       | 1.07 | 7                             | 1.07 | 0.15 |
| <i>Centaurea paniculata</i>    | Asteraceae     | 58697                          | 75719   | 1.29 | 12                       | 1.30 | 8                             | 2.76 | 0.35 |
| <i>Leuzea conifera</i>         | Asteraceae     | 3541                           | 3399    | 0.96 | 13                       | 1.19 | 4                             | 1.41 | 0.35 |
| <i>Allium sphaerocephalon</i>  | Amaryllidaceae | 4011                           | 6057    | 1.51 | 14                       | 1.63 | 5                             | 1.86 | 0.37 |
| <i>Galium aparine</i>          | Rubiaceae      | 472212                         | 783872  | 1.66 | 14                       | 1.22 | 4                             | 1.52 | 0.38 |
